1           **Public events and delayed flight restrictions**  
2           **were the turning point of the COVID-19**  
3           **mitigation policy of Israel**

4  
5           Klausner, Ziv PhD<sup>1 †</sup>; Fattal, Eyal PhD<sup>1\* †</sup>; Hirsch, Eitan PhD<sup>2</sup>;  
6           Shapira, Shmuel C., MD, MPH<sup>3</sup>

7  
8           <sup>1</sup> Department of Applied Mathematics, Israel Institute for Biological  
9           Research, Ness-Ziona, Israel

10          <sup>2</sup> Environmental Sciences Division, Israel Institute for Biological  
11          Research, Ness-Ziona, Israel

12          <sup>3</sup> Director general, Israel Institute for Biological Research, Ness-Ziona,  
13          Israel

14  
15  
16  
17  
18  
19  
20  
21  
22  
23  
24  
25  
26  
27  
28  
29  
30  
31  
32  
33  
34  
35  
36  
37

38          \* Correspondence to: Applied Math department, Israel Institute for Biological Research, P.O. Box 19,  
39          Ness-Ziona, 7410001, ISRAEL. Tel.: +972 8 9381794; fax: +972 8 9381432; e-mail: [eyalf@iibr.gov.il](mailto:eyalf@iibr.gov.il)

40          † These two authors contributed equally to the article

## 41 **Abstract**

### 42 **Background:**

43           Since its emergence the impact of COVID-19 has been profound, and the  
44 public health challenge seem to be the most serious regarding respiratory viruses since  
45 the 1918 H1N1 influenza pandemic. In the absence of effective vaccine or biomedical  
46 treatment, the basic rules of public health measures have not changed, namely public  
47 distancing and personal hygiene.

### 48 **Methods:**

49           In this study we present the results of epidemiological data analysis and  
50 modelling of one month since the onset of the outbreak in Israel. The data analyzed in  
51 this study was obtained from the epidemiological investigation reports that were  
52 released by the Israeli Ministry of Health. In addition to data analysis, we present an  
53 expended deterministic compartment model and simulations of disease outbreak  
54 scenarios emphasizing quarantine and isolation policies given their efficiency.

### 55 **Results:**

56           We analyze and discuss an abrupt change from controlled epidemic regime  
57 (effective reproduction number  $R_0$  of the order of half) to an exponential growth  
58 regime ( $R_0 = 2.18$ ) in light of the actual policy-makers decisions and public behavior  
59 in Israel. We further discuss three different modeled scenarios of quarantine  
60 efficiency: high-efficiency, medium-efficiency, and low-efficiency.

### 61 **Conclusions:**

62           Israel early lessons show that there is no allowance to compromise with the  
63 directive of social distancing. Even before the onset of the pandemic in Israel, fine-  
64 tuned but determined early decisions were taken by policy makers to control flight  
65 arrival from Covid-19 affected regions and to limit public gatherings. These measures

66 have effectively decreased the value of the effective reproductive number ( $R_0$ ) in the  
67 first two weeks. Our analysis show that one particular holyday in Israel has shifted the  
68 occurrence curve from controlled regime to exponential growing regime. This  
69 outcome suggests that even a short lapse in public responsiveness can have a dramatic  
70 effect on public health during pandemic outbreaks.

71

72

73

## 74 **1. Introduction**

75         Since its emergence the impact of COVID-19 has been profound, and the  
76 public health challenge seem to be the most serious seen in a respiratory virus since  
77 the 1918 H1N1 influenza pandemic (Soper 1919). In this study we present the results  
78 of epidemiological data and modelling of one month since the onset of the outbreak in  
79 Isreal, addressing public events occurring during this period and the sensitivity to a  
80 number of public health measures focusing on social distancing (quarantine and  
81 isolation).

82         The epidemiological data studied, consisting of 381 laboratory confirmed  
83 COVID-19 cases, has been obtained from the epidemiological investigation reports  
84 that were released by the Israeli Ministry of Health (Israeli Ministry of Health, 2020).

85         In addition we present an extended deterministic SEIR (Susceptible, Exposed,  
86 Infectious, and Recovered) model to simulate disease outbreak scenarios. In  
87 particular, the model includes quarantine of asymptomatic suspected population  
88 (exposed) and isolation of symptomatic and infectious patients. The model takes into  
89 account the efficiency of the quarantine and isolation measures. We discuss three  
90 different quarantine efficiency scenarios: high-efficiency, medium-efficiency, and

91 low-efficiency. The resulting analysis from the epidemiological cases data are  
92 discussed in light of public events and compared to model simulations. We analyze  
93 and discuss an abrupt change from controlled epidemic regime to an exponential  
94 growth regime in light of policy makers decisions and public behavior.

95

## 96 **2. Methods**

97         The dynamics of spread of epidemics as well as the quarantine-isolation  
98 policy of Israel was modeled using the SEQIR model (e.g. Gumel, et al., 2004). This  
99 is a deterministic compartmental model which allows the implicit inclusion of  
100 biological epidemiological phases (including incubation period) as well as  
101 governmental interventions such as quarantine and their actual efficiency of  
102 implementation. A successful a posteriori implementation of this model to the  
103 transmission dynamics and control of the SARS epidemics in Toronto, Hong Kong,  
104 Singapore and Beijing is given in Gumel, et al., 2004. The model consists of a system  
105 of 7 dynamical equations and 15 parameters. For details of the model and its  
106 parameters see the online supplementary information.

107         The data analyzed in this study was obtained from the epidemiological  
108 investigation reports that were released by the Israeli Ministry of Health (Israeli  
109 Ministry of Health, 2020). From the total of 883 PCR laboratory confirmed COVID-  
110 19 cases we analyzed the 384 cases that were investigated epidemiologically. This  
111 allowed us to separate the imported cases (travelers arriving from abroad) from the  
112 locally infected cases. The data spans over the first month of the COVID-19 outbreak  
113 in Israel, beginning in February 21<sup>st</sup> 2020 and going until March 20<sup>th</sup>. We further note  
114 that during the examined period the number of PCR tests performed rose daily,

115 reaching 1869 at the end of the period. However the proportion of positive tests  
116 remained approximately the same, as 7.9% (Israeli Ministry of Health, 2020).

117 The incidence curve was modelled as a fit to an exponential growth function  
118 (de Silva, et al., 2009; Zhao, et al., 2020). Several serial interval distributions that  
119 were estimated for COVID-19 were examined (Nishiura, et al., 2020; Tapiwa, et al.,  
120 2020; Zhao, et al., 2020).

121

### 122 **3. Results**

123 The dynamics of epidemic spread in Israel in terms of daily reported  
124 confirmed cases is shown in fig. 1. There are two distinct regimes in the curve. The  
125 first ended in March 8, 2020 in which the number of daily new cases was constantly  
126 less than 5. The second period, from March 9, 2020 is characterized by a delayed rise  
127 in the daily number of new cases (due to incubation period), which resembles to an  
128 exponential growth (red line, in figure 1). Although, most of the examined period  
129 was dominated by new cases of travelers arriving from abroad, near the end of the  
130 period, the number of daily local infections exceeded the number of travel associated  
131 cases.

a)

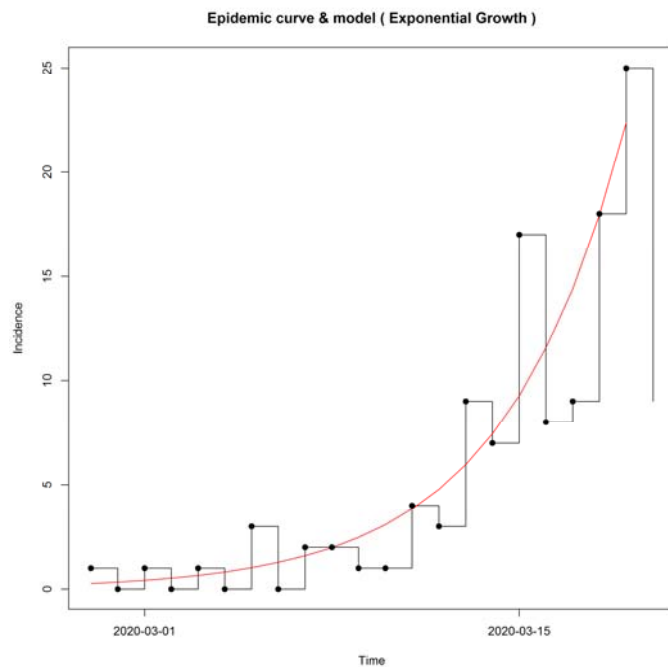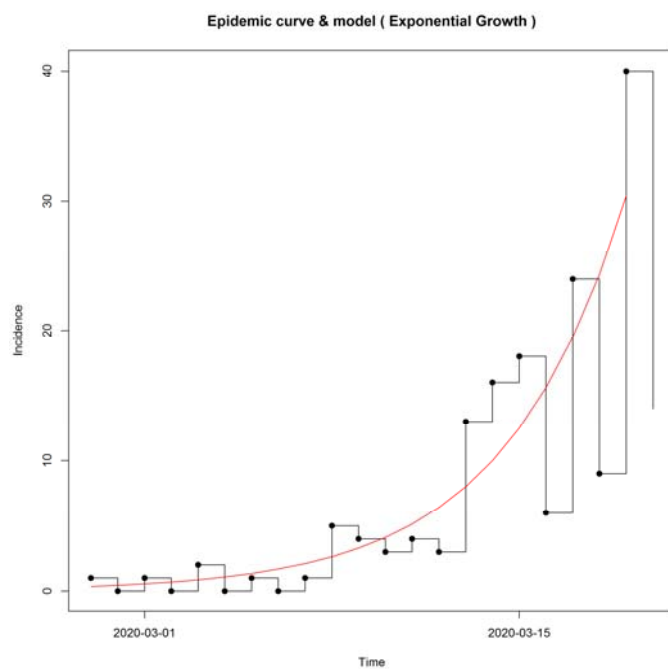

132 FIG. 1. Daily reported confirmed COVID-19 cases in Israel: a) cases of  
133 travelers arriving Israel from abroad; b) cases infected locally  
134

135           The effective reproduction number,  $R_0$ , was estimated for the daily new cases  
136 data of the first month of the COVID-19 epidemic. The lowest estimated  $R_0$  was 2.08  
137 (95%CI 1.92-2.5) for the Gamma distributed serial interval with mean 4.4 and SD 3  
138 days (Zhao, et al., 2020). The highest estimate was 2.37 for the Gamma distributed  
139 serial interval with mean 5.2 and SD 2.8 days (Tapiwa, et al., 2020). The mean  $R_0$   
140 overall the serial interval distributions examined, was 2.185.

141           The SEIQR model solutions are characterized by 3 locally stable equilibrium  
142 points in parameters space. These refer to the following regimes or types of dynamics  
143 of epidemic spread: controlled (decaying), flattened, uncontrolled (baseline SEIR  
144 model; further details can be found in the supplementary material). In this study we  
145 simulated three scenarios, the first corresponding to the first equilibrium and two  
146 corresponding to the second:

- 147           1. A controlled high-efficiency quarantining (decaying green curve in  
148           Fig. 2). This regime is characterized by an early entry of asymptomatic  
149           suspected population to home quarantine. Moreover we assume the  
150           infectiousness in home quarantine is one sixth compared to free  
151           asymptomatic. The efficiency of isolation is 70%.
- 152           2. A flattened for medium-efficiency quarantining (purple curve in Fig.  
153           2). This regime is characterized by a late entry of asymptomatic  
154           suspected population to home quarantine. Moreover we assume the  
155           infectiousness in home quarantine is one third compared to free  
156           asymptomatic. The efficiency of isolation is 70%.
- 157           3. A flattened for low-efficiency quarantining (light-blue curve in Fig. 2).  
158           This regime is characterized by a late entry of asymptomatic suspected  
159           population to home quarantine. Moreover we assume the

160 infectiousness in home quarantine is similar to free asymptomatic. The  
161 efficiency of isolation is 30%.  
162 As discussed above, the dynamics of epidemic spread in Israel until March 8, 2020  
163 corresponds to the controlled regime characterizes with (green curve in Fig.  
164 2). On the other hand after March 8, 2020 the regime corresponds to the flattened  
165 regime with low-efficiency quarantining and .

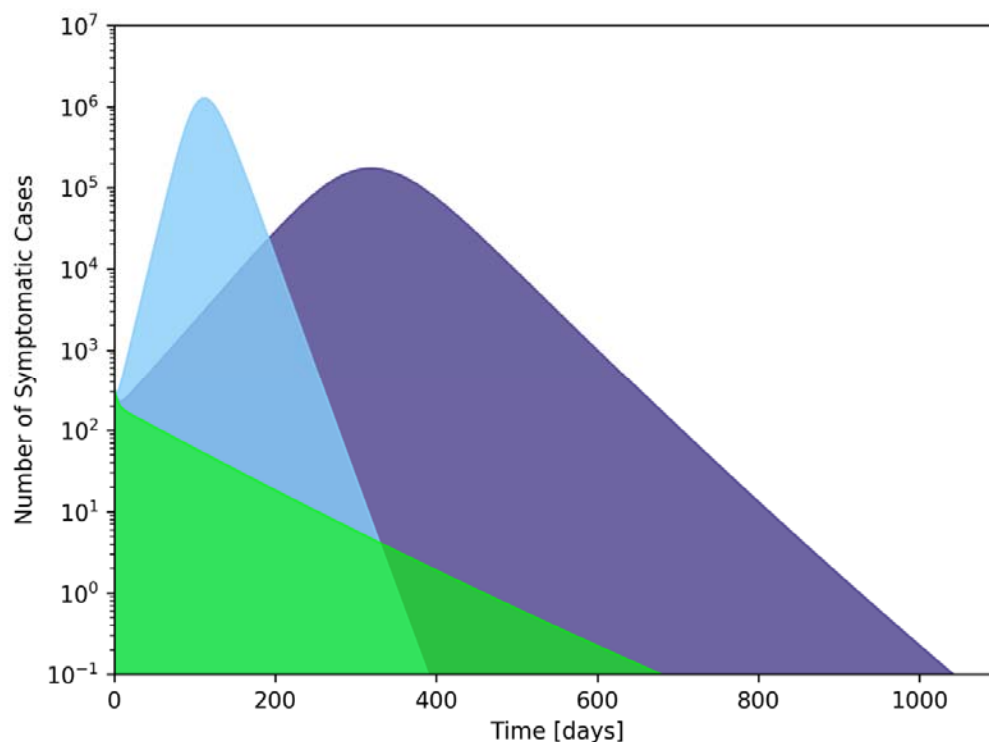

166  
167 FIG. 2. Total number of symptomatic cases in Israel from SEQIIR model  
168 simulations for 3 scenarios: green – high-efficiency quarantining, purple – medium-  
169 efficiency quarantining, light-blue – low-efficiency quarantining.

170

## 171 4. Discussion

172 Israel has begun early its mitigation policy against the COVID-19 epidemic.  
173 From the beginning of February, it was decided: to close all border passages (via land,



174 sea and air) to people that are not Israeli citizens or resident that have visited China  
175 recently; to stop all direct flights from Israel to China and to require Israeli citizens  
176 returning from China or that were in touch with a confirmed COVID-19 patients to a  
177 14 days home quarantine. A short while later, the quarantine requirement was  
178 expanded to other Asian countries. The first COVID-19 patients in Israel were two  
179 passengers that returned from the “Diamond Princess”, in 21 and 23 of February.  
180 They entered directly to hospital isolation. A week later, a passenger from Italy was  
181 diagnosed as a COVID-19 patient, and Italy was added to the list of countries that  
182 require 14 days quarantine.

183         The quarantine-isolation policy succeeded in keeping the rate of daily new  
184 cases small, up until March 9<sup>th</sup>. Then, 4 days later, a sudden change of regime has  
185 occurred, which was manifested by the distinct change of the epidemic curve of Israel  
186 towards exponential growth. March 15<sup>th</sup> marks the first time that the daily new cases  
187 of locally infected were higher than the new travel associated cases.

188         The timing of this abrupt change is not of coincidence. Regarding the cases  
189 arriving from abroad, a requirement for home quarantine affecting all travelers  
190 arriving began on March 9<sup>th</sup>. Moreover, during the period between March 9<sup>th</sup> to 11<sup>th</sup> a  
191 Jewish holiday, Purim, was celebrated. This holiday is characterized by big parades  
192 organized by local municipalities, as well as religious gatherings and privately  
193 organized parties. Although authorities cancelled the public parades, many privately  
194 organized and religious crowding had occurred. Regrettably, these drove Israel from a  
195 controlled, mitigated regime to an exponential growth, as described in the results  
196 section. Therefore, despite its intense efforts, Israel’s effective  $R_0$  for the period  
197 ending in March 20<sup>th</sup> stands on around 2.185, slightly smaller than the  $R_0$  of 2.6-3.2  
198 estimated for the republic of Korea and Italy, for the period ending in March 5<sup>th</sup>.

199 Such abrupt transition based on social behavior emphasizes the fragility of mitigation  
200 policies.

201 We therefore emphasize the importance of early fine-tuned but intense  
202 directives for social distancing and isolation measures. This study clearly  
203 demonstrates the lesson learned from the Israeli policy, that even a short lapse in  
204 public responsiveness can have a dramatic effect on public health during pandemic  
205 outbreak.

206

207

208

## 209 **References**

- 210 1. Israel Ministry of Health. Information on confirmed patients and COVID-19  
211 press releases. [https://govextra.gov.il/ministry-of-health/corona/corona-](https://govextra.gov.il/ministry-of-health/corona/corona-virus/spokesman-messages-corona/)  
212 [virus/spokesman-messages-corona/](https://govextra.gov.il/ministry-of-health/corona/corona-virus/spokesman-messages-corona/). Accessed Mar 22, 2020.
- 213 2. De Silva UC, Warachit J, Waicharoen S, Chittaganpitch M. 2009. A  
214 preliminary analysis of the epidemiology of Influenza A(H1N1)v virus  
215 infection in Thailand from early outbreak data. *Eurosurveillance*: **14**(31).
- 216 3. Nishiura H, Linton NM, Akhmetzhanov AR. 2020. Serial interval of novel  
217 coronavirus (COVID-19) infections. *International Journal of Infectious*  
218 *Diseases* DOI: 10.1016/j.ijid.2020.02.060
- 219 4. Zhao S, Gao D, Zhuang Z, Chong MKC, Cai Y, Ran J, Cao P, Wang K, Lou  
220 Y, Wang W, Yang L, He D. 2020. Estimating the serial interval of the novel  
221 coronavirus disease (COVID-19): A statistical analysis using the public data in  
222 Hong Kong from January 16 to February 15, 2020. preprint is under

- 223 consideration at Infectious Diseases of Poverty. DOI: 10.21203/rs.3.rs-  
224 18805/v1
- 225 5. Tapiwa G, Cecile K, Dongxuan C, Andrea T, Christel F, Jacco W, Niel H.  
226 2020. Estimating the generation interval for COVID-19 based on symptom  
227 onset data. medRxiv preprint DOI: 10.1101/2020.03.05.20031815
- 228 6. Gumel AB, Ruan S, Day T, Watmough J, Brauer F, van den Driessche P,  
229 Gabrielson D, Bowman C, Alexander ME, Ardal S, Wu J, Sahai BM.  
230 Modelling strategies for controlling SARS outbreaks. Proc Biol Sci. 2004;  
231 **271**(1554):2223-32. doi:10.1098/rspb.2004.2800
- 232 7. Soper GA. 1919. The lessons of the Pandemic. *Science* **49**(1274): 501-506.  
233 DOI: 10.1126/science.49.1274.501
- 234 8. Zhuang Z, Zhao S, Lin Q, Cao P, Lou Y, Yang L, Yang S, He D, Xiao L.  
235 2020. Preliminary estimating the reproduction number of the coronavirus  
236 disease (COVID-19) outbreak in Republic of Korea and Italy by 5 March  
237 2020. medRxiv preprint DOI: <https://doi.org/10.1101/2020.03.02.20030312>  
238
- 239  
240  
241  
242  
243  
244  
245  
246  
247  
248  
249  
250  
251  
252  
253  
254  
255  
256

257  
258  
259  
260  
261  
262  
263  
264  
265  
266
